# Supplementary material for: The Effect of Mycotoxins and Silymarin on Liver Lipidome of Mice with Non-Alcoholic Fatty Liver Disease
Source: MDPI journal article supplement (doi:10.3390/biom11111723), 2021-11-19

**Table S1.** Calculation of doses of particular mycotoxins in the study.

| Mycotoxin | Concentration of mycotoxins in milk thistle-based dietary supplement (ng/g)* | Concentration of mycotoxins considered for administration of mice (multiplied by 1000), ng/g | Producer's recommended daily dose (DD) of preparation |                           | ng of mycotoxins in daily dose | ng of mycotoxins per kg of b. w. and day | ng of mycotoxins per mouse (0.03 kg) and day |
|-----------|------------------------------------------------------------------------------|----------------------------------------------------------------------------------------------|-------------------------------------------------------|---------------------------|--------------------------------|------------------------------------------|----------------------------------------------|
|           |                                                                              |                                                                                              | No of tablets*                                        | Weight of the tablet (g)* |                                |                                          |                                              |
| AOH       | 6 834                                                                        | 6 834 000                                                                                    | 2                                                     | 0.83                      | 11 344 440                     | 162 063                                  | 4 862                                        |
| AME       | 2 441                                                                        | 2 441 000                                                                                    |                                                       |                           | 4 052 060                      | 57 887                                   | 1 737                                        |
| DON       | 6 477                                                                        | 6 477 000                                                                                    |                                                       |                           | 10 751 820                     | 153 597                                  | 4 608                                        |
| ZEA       | 282                                                                          | 282 000                                                                                      |                                                       |                           | 468 120                        | 6 687                                    | 201                                          |
| T-2       | 5 958                                                                        | 5 958 000                                                                                    |                                                       |                           | 9 890 280                      | 141 290                                  | 4 239                                        |
| HT-2      | 2 985                                                                        | 2 985 000                                                                                    |                                                       |                           | 4 955 100                      | 70 787                                   | 2 124                                        |
| DAS       | 36                                                                           | 35 973                                                                                       |                                                       |                           | 59 716                         | 853                                      | 26                                           |
| TEN       | 2 127                                                                        | 2 127 000                                                                                    |                                                       |                           | 3 530 820                      | 50 440                                   | 1 513                                        |
| BEA       | 3 891                                                                        | 3 891 000                                                                                    |                                                       |                           | 6 459 060                      | 92 272                                   | 2 768                                        |
| ENN-A     | 722                                                                          | 722 000                                                                                      |                                                       |                           | 1 198 520                      | 17 122                                   | 514                                          |
| ENN-A1    | 1 142                                                                        | 1 142 000                                                                                    |                                                       |                           | 1 895 720                      | 27 082                                   | 812                                          |
| ENN-B     | 2 918                                                                        | 2 918 000                                                                                    |                                                       |                           | 4 843 880                      | 69 198                                   | 2 076                                        |
| ENN-B1    | 1 822                                                                        | 1 822 000                                                                                    |                                                       |                           | 3 024 520                      | 43 207                                   | 1 296                                        |

\* estimated based on our previous study (Fenclova et al., 2019), sample No 21, coded as CZ 2.

**Table S2:** The fold changes for 92 lipid features filtered by ANOVA. The lipids are ordered by the lipid class and fatty acid chains. The fold changes are expressed as  $\log_2(\text{FC})$ , so the breakpoint between downregulation and upregulation is equal to 0. The fold changes over 50% are highlighted in red).

| Lipid name @ retention time (min) @ $m/z$ |                                  | FC         |            |            |            |            |            |
|-------------------------------------------|----------------------------------|------------|------------|------------|------------|------------|------------|
|                                           |                                  | B2 over A1 | C3 over A1 | D4 over A1 | B2 over C3 | B2 over D4 | D4 over C3 |
| CER                                       | Cer(18:1/16:0)@9.69@596.5242     | 0.25       | -0.03      | 0.18       | 0.28       | 0.07       | 0.21       |
|                                           | Cer(18:1/23:0)@12.76@694.6332    | 0.43       | 0.00       | 0.22       | 0.43       | 0.21       | 0.22       |
|                                           | Cer(18:2/23:0)@11.99@632.5962    | 0.41       | 0.03       | 0.22       | 0.38       | 0.18       | 0.19       |
|                                           | Cer(25:2/15:0)@11.84@678.6015    | 0.51       | 0.05       | 0.20       | 0.46       | 0.31       | 0.15       |
| DG                                        | DG(16:0/18:2)@9.99@610.5401      | 0.31       | 0.27       | 0.41       | 0.04       | -0.10      | 0.14       |
|                                           | DG(18:1/18:1)@10.56@638.5713     | 0.37       | 0.22       | 0.57       | 0.15       | -0.20      | 0.35       |
|                                           | DG(18:1/18:2)@10.01@636.5559     | 0.60       | 0.36       | 0.56       | 0.24       | 0.04       | 0.20       |
|                                           | DG(18:1/20:4)@9.82@660.5557      | 0.68       | 0.35       | 0.50       | 0.33       | 0.18       | 0.15       |
|                                           | DG(18:2/18:2)@9.47@634.5400      | 0.80       | 0.47       | 0.64       | 0.34       | 0.16       | 0.17       |
|                                           | DG(18:2/20:1)@10.75@664.5865     | 0.84       | 0.28       | 0.48       | 0.56       | 0.36       | 0.20       |
|                                           | DG(18:2/20:4)@9.18@658.5387      | 0.97       | 0.44       | 0.60       | 0.53       | 0.37       | 0.15       |
|                                           | DMPE(16:0/18:1)@9.65@744.5508    | -0.25      | -0.07      | -0.06      | -0.18      | -0.19      | 0.01       |
| FFA                                       | FA(18:1)@5.16@281.2481           | 0.42       | 0.24       | 0.22       | 0.18       | 0.20       | -0.02      |
|                                           | FA(22:5)@4.11@329.2476           | 1.08       | 0.45       | 0.02       | 0.63       | 1.06       | -0.43      |
| FAHFA                                     | FAHFA(16:1/18:3)@3.79@529.4217   | 0.35       | 0.16       | 0.44       | 0.20       | -0.09      | 0.29       |
|                                           | FAHFA(16:1/20:4)@3.86@555.4373   | 0.26       | 0.11       | 0.35       | 0.15       | -0.09      | 0.24       |
|                                           | FAHFA(18:0/22:3)@6.28@615.5330   | 0.32       | 0.22       | 0.29       | 0.10       | 0.03       | 0.07       |
|                                           | FAHFA(20:1/22:3)@6.46@641.5474   | 0.99       | 0.40       | 0.34       | 0.59       | 0.65       | -0.06      |
|                                           | FAHFA(20:4/18:3)@3.64@579.4372   | 0.04       | 0.14       | 0.29       | -0.10      | -0.25      | 0.15       |
|                                           | HexCer(18:1/22:1)@10.75@780.6329 | -0.46      | -0.01      | -0.12      | -0.45      | -0.35      | -0.10      |
|                                           | HexCer(22:1/16:0)@10.81@754.6174 | -0.36      | -0.04      | -0.17      | -0.32      | -0.19      | -0.13      |
| LPC                                       | LPC(18:0)@3.56@524.3706          | 0.39       | 0.16       | 0.24       | 0.23       | 0.15       | 0.08       |
|                                           | LPC(19:0)@4.56@538.3858          | 0.58       | 0.41       | 0.35       | 0.17       | 0.23       | -0.06      |

|    |                              |       |       |       |       |       |       |
|----|------------------------------|-------|-------|-------|-------|-------|-------|
|    | LPC(20:4)@2.05@544.3383      | 0.51  | 0.49  | 0.17  | 0.02  | 0.35  | -0.32 |
|    | LPC(22:5)@2.32@570.3545      | 0.30  | 0.57  | -0.03 | -0.27 | 0.33  | -0.60 |
| PC | PC(16:0/18:2)@9.20@816.5725  | -0.24 | -0.06 | -0.04 | -0.17 | -0.20 | 0.03  |
|    | PC(16:0/20:1)@9.97@788.6163  | -0.30 | -0.15 | -0.14 | -0.15 | -0.16 | 0.01  |
|    | PC(16:0/20:4)@8.51@782.5678  | 0.03  | 0.07  | -0.04 | -0.04 | 0.07  | -0.11 |
|    | PC(16:0/22:6)@8.27@806.5675  | 0.04  | 0.08  | -0.15 | -0.05 | 0.19  | -0.24 |
|    | PC(18:0/18:1)@10.52@846.6209 | -0.33 | -0.16 | -0.08 | -0.17 | -0.25 | 0.08  |
|    | PC(18:0/18:2)@9.80@844.6046  | -0.15 | -0.08 | 0.00  | -0.08 | -0.16 | 0.08  |
|    | PC(18:0/20:3)@10.30@870.6196 | -0.55 | -0.02 | 0.19  | -0.52 | -0.73 | 0.21  |
|    | PC(18:0/20:3)@9.57@812.6147  | -0.25 | -0.11 | -0.05 | -0.15 | -0.21 | 0.06  |
|    | PC(18:0/22:5)@9.96@894.6195  | -0.12 | 0.26  | -0.39 | -0.38 | 0.27  | -0.65 |
|    | PC(18:0/22:6)@9.02@834.5993  | 0.00  | 0.02  | -0.18 | -0.02 | 0.18  | -0.19 |
|    | PC(18:1/18:2)@9.34@842.5886  | -0.27 | -0.01 | 0.02  | -0.25 | -0.29 | 0.03  |
|    | PC(18:1/20:3)@8.95@810.5973  | -0.12 | -0.02 | -0.05 | -0.11 | -0.07 | -0.03 |
|    | PC(18:1/22:6)@8.57@890.5885  | 0.10  | 0.13  | -0.16 | -0.03 | 0.27  | -0.30 |
|    | PC(18:2/20:4)@8.04@864.5729  | 0.03  | 0.19  | -0.07 | -0.15 | 0.11  | -0.26 |
|    | PC(18:2/22:6)@7.71@830.5656  | 0.17  | 0.36  | -0.12 | -0.18 | 0.29  | -0.48 |
|    | PC(34:3)@8.03@778.5360       | 0.20  | -0.01 | 0.14  | 0.21  | 0.06  | 0.16  |
|    | PC(36:1)@9.95@810.5989       | -0.50 | -0.27 | -0.37 | -0.23 | -0.13 | -0.10 |
|    | PC(38:2)@10.08@836.6136      | -0.42 | -0.21 | -0.43 | -0.21 | 0.01  | -0.22 |
|    | PC(38:6)@7.92@828.5508       | 0.04  | 0.19  | 0.01  | -0.16 | 0.03  | -0.18 |
|    | PC(40:7)@8.38@854.5664       | 0.16  | 0.13  | -0.02 | 0.03  | 0.19  | -0.15 |
|    | PC(40:8)@7.71@852.5508       | 0.15  | 0.29  | -0.10 | -0.13 | 0.25  | -0.39 |
| PE | PE(16:0/18:2)@8.88@716.5229  | -0.18 | -0.13 | 0.11  | -0.05 | -0.29 | 0.24  |
|    | PE(16:0/18:2)@9.13@714.5057  | -0.31 | -0.14 | 0.04  | -0.17 | -0.35 | 0.18  |
|    | PE(16:0/20:4)@8.92@738.5059  | -0.20 | -0.06 | -0.06 | -0.14 | -0.14 | 0.00  |
|    | PE(16:0/22:6)@8.65@762.5064  | -0.06 | 0.00  | -0.10 | -0.06 | 0.04  | -0.10 |
|    | PE(18:0/18:1)@10.73@744.5521 | -0.10 | -0.07 | 0.16  | -0.02 | -0.26 | 0.24  |
|    | PE(18:0/18:2)@10.02@742.5370 | -0.27 | -0.24 | 0.00  | -0.03 | -0.27 | 0.25  |

|           |                                        |       |       |       |       |       |       |
|-----------|----------------------------------------|-------|-------|-------|-------|-------|-------|
|           | PE(18:0/20:3)@10.22@768.5502           | -0.35 | -0.27 | -0.08 | -0.07 | -0.27 | 0.20  |
|           | PE(18:0/20:4)@9.85@766.5371            | -0.16 | -0.08 | -0.07 | -0.08 | -0.08 | 0.01  |
|           | PE(18:0/22:6)@9.57@790.5376            | -0.11 | -0.14 | -0.16 | 0.02  | 0.05  | -0.03 |
|           | PE(18:1/18:2)@9.23@740.5214            | -0.09 | -0.07 | 0.10  | -0.01 | -0.18 | 0.17  |
|           | PE(18:1/20:3)@9.63@766.5366            | -0.31 | 0.02  | -0.12 | -0.33 | -0.19 | -0.14 |
|           | PE(18:1/20:4)@9.27@764.5214            | -0.08 | 0.18  | -0.27 | -0.26 | 0.19  | -0.45 |
|           | PE(34:3)@8.23@714.5066                 | 0.05  | -0.03 | 0.34  | 0.08  | -0.29 | 0.37  |
|           | PE(36:1)@10.15@746.5685                | -0.13 | -0.10 | 0.15  | -0.04 | -0.28 | 0.24  |
|           | PE(36:2)@9.60@744.5547                 | -0.09 | -0.16 | 0.12  | 0.06  | -0.22 | 0.28  |
|           | PE(36:3)@8.95@742.5382                 | 0.02  | -0.05 | 0.21  | 0.07  | -0.19 | 0.25  |
|           | PE(36:4)@8.35@740.5220                 | 0.01  | 0.06  | 0.32  | -0.04 | -0.31 | 0.27  |
|           | PE(38:3)@9.75@770.5680                 | -0.17 | -0.15 | -0.01 | -0.01 | -0.16 | 0.15  |
|           | PE(38:5)@9.61@766.5358                 | -0.02 | -0.11 | 0.17  | 0.09  | -0.19 | 0.28  |
|           | PE(40:6)@9.75@792.5513                 | -0.24 | -0.16 | 0.07  | -0.09 | -0.32 | 0.23  |
|           | PI(18:0/20:3)@8.88@887.5625            | -0.39 | -0.32 | -0.08 | -0.07 | -0.30 | 0.24  |
| Plasmenyl | plasmanyl-PE(36:5)@9.07@724.5268       | -0.12 | -0.10 | -0.13 | -0.02 | 0.01  | -0.04 |
|           | plasmanyl-PE(38:5)@9.79@752.5581       | 0.18  | -0.06 | -0.12 | 0.24  | 0.31  | -0.06 |
|           | plasmenyl-PE(16:0/20:4)@9.36@722.5106  | -0.22 | -0.15 | -0.29 | -0.07 | 0.08  | -0.15 |
|           | plasmenyl-PE(16:0/22:4)@10.00@750.5416 | -0.34 | -0.10 | -0.19 | -0.24 | -0.15 | -0.09 |
|           | plasmenyl-PE(16:0/22:6)@9.05@746.5101  | 0.11  | -0.08 | -0.27 | 0.19  | 0.38  | -0.19 |
|           | plasmenyl-PE(18:0/22:6)@9.95@774.5413  | 0.33  | -0.01 | -0.27 | 0.34  | 0.60  | -0.26 |
|           | plasmenyl-PE(18:1/18:1)@10.50@726.5417 | 0.76  | 0.08  | 0.58  | 0.69  | 0.18  | 0.50  |
|           | plasmenyl-PE(18:1/20:1)@11.28@754.5729 | 0.38  | -0.12 | 0.32  | 0.50  | 0.05  | 0.45  |
|           | plasmenyl-PE(18:1/22:4)@10.13@776.5571 | -0.05 | -0.10 | -0.22 | 0.05  | 0.17  | -0.12 |
| TG        | plasmenyl-PE(18:1/22:6)@9.19@772.5261  | 0.63  | 0.17  | -0.24 | 0.46  | 0.87  | -0.40 |
|           | TG(16:0/16:0/18:1)@13.96@850.7850      | -0.36 | -0.15 | 0.18  | -0.21 | -0.54 | 0.34  |
|           | TG(16:0/18:0/18:1)@14.28@878.8157      | -0.42 | -0.27 | 0.18  | -0.15 | -0.60 | 0.45  |
|           | TG(16:0/18:1/22:6)@13.11@922.7855      | 1.02  | 0.26  | 0.28  | 0.76  | 0.74  | 0.02  |
|           | TG(16:0/18:1/22:6)@13.28@922.7855      | 0.87  | 0.22  | 0.11  | 0.65  | 0.76  | -0.10 |

|                                   |       |       |      |      |       |       |
|-----------------------------------|-------|-------|------|------|-------|-------|
| TG(16:0/18:2/18:3)@12.91@870.7547 | 0.20  | -0.02 | 0.29 | 0.22 | -0.09 | 0.31  |
| TG(16:0/18:2/22:6)@12.93@920.7694 | 0.82  | 0.11  | 0.11 | 0.70 | 0.70  | 0.00  |
| TG(16:0/18:3/18:3)@12.57@868.7386 | 0.34  | -0.04 | 0.33 | 0.38 | 0.01  | 0.37  |
| TG(16:0/18:3/18:3)@12.83@868.7386 | 0.07  | -0.09 | 0.39 | 0.17 | -0.32 | 0.49  |
| TG(16:1/16:1/18:2)@12.86@844.7389 | -0.08 | -0.08 | 0.43 | 0.01 | -0.50 | 0.51  |
| TG(17:0/18:2/18:2)@13.44@886.7852 | 0.35  | 0.14  | 0.35 | 0.21 | 0.00  | 0.21  |
| TG(18:1/18:1/20:1)@14.25@930.8480 | 0.51  | 0.09  | 0.38 | 0.42 | 0.13  | 0.29  |
| TG(18:1/18:2/18:3)@12.91@896.7699 | 0.56  | 0.26  | 0.20 | 0.29 | 0.36  | -0.06 |
| TG(18:1/18:2/20:1)@14.01@928.8291 | 0.62  | 0.10  | 0.27 | 0.52 | 0.35  | 0.17  |
| TG(18:1/18:3/20:1)@13.81@926.8165 | 0.47  | 0.08  | 0.17 | 0.39 | 0.30  | 0.09  |
| TG(18:2/18:2/18:3)@12.78@894.7538 | 0.42  | 0.02  | 0.23 | 0.41 | 0.19  | 0.22  |

**Table S3:** The effect of mycotoxin exposure on hepatic lipid profile.

Data are from binary OPLS-DA models with VIP score > 1; B2 vs. A1 (38 lipids)

- higher intensity in B2 (mycotoxin-exposed mice)

- higher intensity in A1 (control mice)

| OPLSDA B2 vs. A1        |           |
|-------------------------|-----------|
| Lipid name              | VIP score |
| DG(18:2/20:4)           | 1.83      |
| FAHFA(20:1/22:3)        | 1.79      |
| TG(16:0/18:1/22:6)      | 1.78      |
| FA(22:5)                | 1.76      |
| TG(16:0/18:1/22:6)      | 1.73      |
| DG(18:2/18:2)           | 1.72      |
| DG(18:2/20:1)           | 1.70      |
| TG(16:0/18:2/22:6)      | 1.70      |
| plasmenyl-PE(18:1/18:1) | 1.57      |
| LPC(19:0)               | 1.55      |
| DG(18:1/18:2)           | 1.46      |
| TG(18:1/18:2/20:1)      | 1.44      |
| DG(18:1/20:4)           | 1.43      |
| TG(18:1/18:1/20:1)      | 1.34      |
| TG(18:1/18:2/18:3)      | 1.34      |
| Cer(25:2/15:0)          | 1.33      |
| LPC(20:4)               | 1.30      |
| Cer(18:1/23:0)          | 1.29      |
| Cer(18:2/23:0)          | 1.20      |

|                        |      |
|------------------------|------|
| TG(18:1/18:3/20:1)     | 1.19 |
| TG(18:2/18:2/18:3)     | 1.18 |
| FA(18:1)               | 1.17 |
| LPC(18:0)              | 1.17 |
| PEP(18:1/22:6)         | 1.08 |
| FAHFA(16:1/18:3)       | 1.06 |
| DG(18:1/18:1)          | 1.06 |
| TG(17:0/18:2/18:2)     | 1.02 |
| FAHFA(16:1/20:4)       | 1.01 |
| PC(36:1)               | 1.36 |
| PC(18:0/20:3)          | 1.29 |
| PC(38:2)               | 1.19 |
| plasmeyl-PE(16:0/22:4) | 1.18 |
| PE(18:0/20:3)          | 1.15 |
| HexCer(18:1/22:1)      | 1.14 |
| TG(16:0/18:0/18:1)     | 1.13 |
| PI(18:0/20:3)          | 1.07 |
| PC(18:0/18:1)          | 1.07 |
| PE(16:0/18:2)          | 1.02 |

**Table S4:** The effect of mycotoxin plus silymarin exposure on hepatic lipid profile.

Data are from binary OPLS-DA models with VIP score > 1; C3 vs. A1 (29 lipids)

- higher intensity in C3 (silymarin-treated mice)

- higher intensity in A1 (control mice)

| OPLSDA C3 vs. A1   |           |
|--------------------|-----------|
| Lipid name         | VIP score |
| LPC(22:5)          | 2.26      |
| LPC(19:0)          | 1.96      |
| DG(18:2/20:4)      | 1.94      |
| DG(18:2/18:2)      | 1.94      |
| FA(22:5)           | 1.85      |
| PC(18:2/22:6)      | 1.80      |
| LPC(20:4)          | 1.77      |
| DG(18:1/20:4)      | 1.75      |
| PC(40:8)           | 1.73      |
| FAHFA(20:1/22:3)   | 1.73      |
| DG(18:1/18:2)      | 1.65      |
| DG(16:0/18:2)      | 1.51      |
| DG(18:2/20:1)      | 1.41      |
| FA(18:1)           | 1.32      |
| FAHFA(18:0/22:3)   | 1.31      |
| TG(18:1/18:2/18:3) | 1.23      |
| PC(38:6)           | 1.22      |
| PC(18:0/22:5)      | 1.22      |



|                    |      |
|--------------------|------|
| PC(18:2/20:4)      | 1.15 |
| TG(16:0/18:1/22:6) | 1.14 |
| DG(18:1/18:1)      | 1.07 |
| PI(18:0/20:3)      | 1.61 |
| PE(18:0/20:3)      | 1.57 |
| PE(18:0/18:2)      | 1.53 |
| PC(36:1)           | 1.51 |
| TG(16:0/18:0/18:1) | 1.34 |
| PC(38:2)           | 1.16 |
| PE(36:2)           | 1.12 |
| PE(38:3)           | 1.04 |

**Table S5:** The effect of mycotoxin plus silymarin exposure on hepatic lipid profile.

Data are from binary OPLS-DA models with VIP score > 1; D4 vs. A1 (33 lipids)

- higher intensity in D4 (mycotoxin plus silymarin-exposed mice)

- higher intensity in A1 (control mice)

| OPLSDA D4 vs. A1        |           |
|-------------------------|-----------|
| Lipid name              | VIP score |
| DG(18:2/18:2)           | 2.11      |
| DG(18:1/18:1)           | 1.99      |
| DG(18:1/18:2)           | 1.97      |
| DG(18:2/20:4)           | 1.89      |
| DG(18:1/20:4)           | 1.75      |
| plasmenyl-PE(18:1/18:1) | 1.74      |
| DG(18:2/20:1)           | 1.67      |
| DG(16:0/18:2)           | 1.62      |
| FAHFA(16:1/18:3)        | 1.58      |
| FAHFA(16:1/20:4)        | 1.52      |
| TG(16:0/18:3/18:3)      | 1.51      |
| TG(16:1/16:1/18:2)      | 1.43      |
| TG(17:0/18:2/18:2)      | 1.43      |
| LPC(19:0)               | 1.42      |
| PE(34:3)                | 1.38      |
| PE(36:4)                | 1.35      |
| TG(18:1/18:1/20:1)      | 1.34      |
| FAHFA(18:0/22:3)        | 1.28      |

|                         |      |
|-------------------------|------|
| TG(16:0/18:3/18:3)      | 1.28 |
| FAHFA(20:4/18:3)        | 1.28 |
| TG(16:0/18:2/18:3)      | 1.21 |
| LPC(18:0)               | 1.09 |
| plasmenyl-PE(18:1/20:1) | 1.07 |
| PE(36:3)                | 1.07 |
| TG(18:1/18:2/20:1)      | 1.02 |
| TG(16:0/18:1/22:6)      | 1.02 |
| PC(38:2)                | 1.57 |
| PC(36:1)                | 1.43 |
| PC(18:0/22:5)           | 1.26 |
| plasmenyl-PE(16:0/22:6) | 1.16 |
| plasmenyl-PE(18:0/22:6) | 1.12 |
| plasmenyl-PE(16:0/20:4) | 1.05 |
| PE(18:1/20:4)           | 1.01 |

**Figure S1:** Liver steatosis staging: A - score 0 (steatosis of less than 5 % of liver cells), B - score 1 (steatosis of up to 33 % of liver cells), C - score 2 (steatosis of up to 66 % of liver cells), D - score 3 (steatosis of more than 66 % of liver cells).

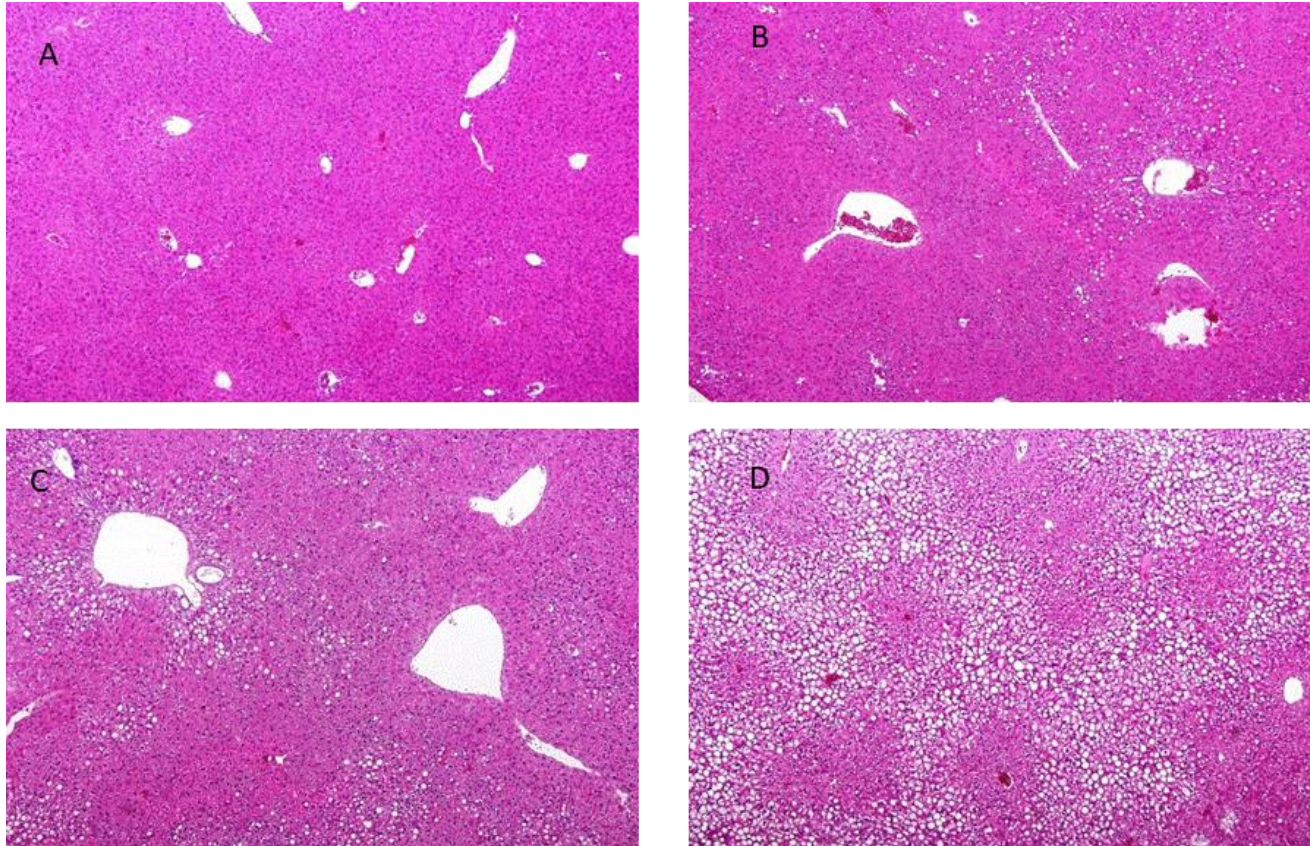

**Figure S2:** Boxplots for all 28 significant lipids with OPLS-DA VIP score >1, significantly contributing to group separation in at least two binary comparisons.

**DG:**

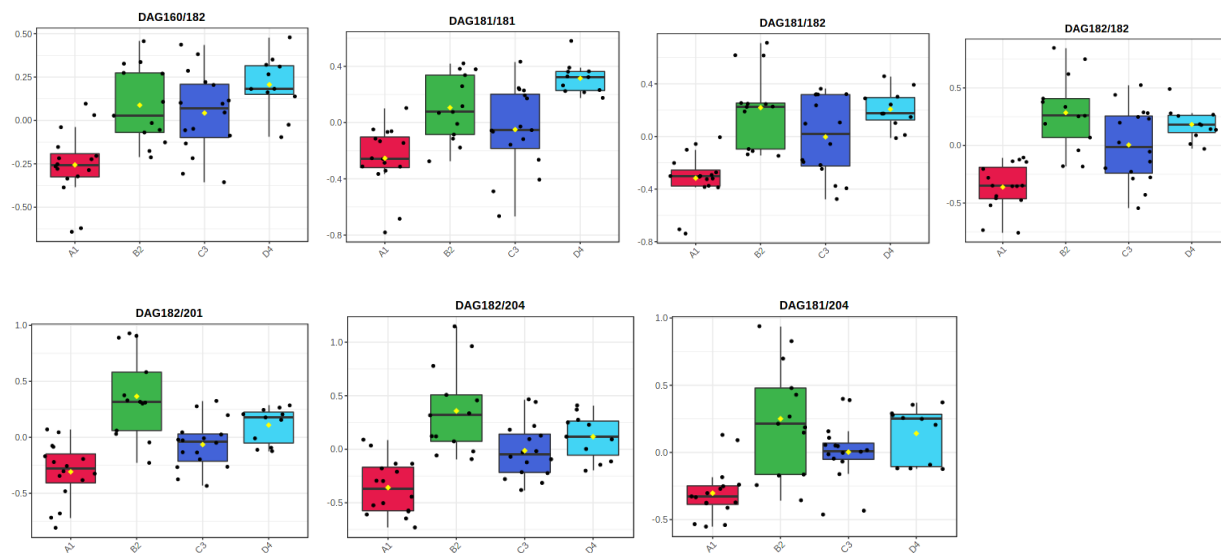

**FA:**

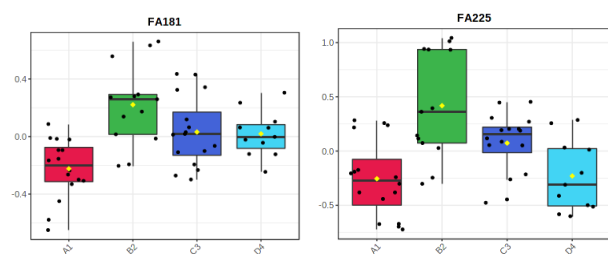

FAHFA:

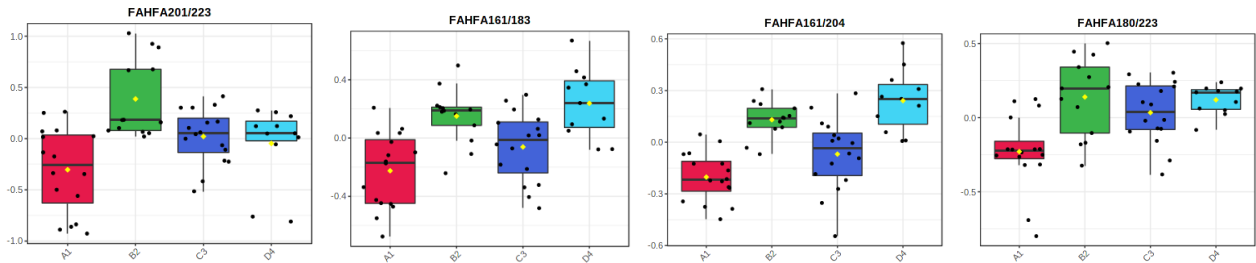

LPC:

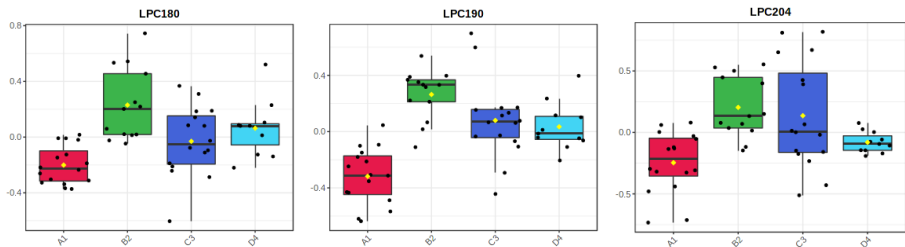

PL:

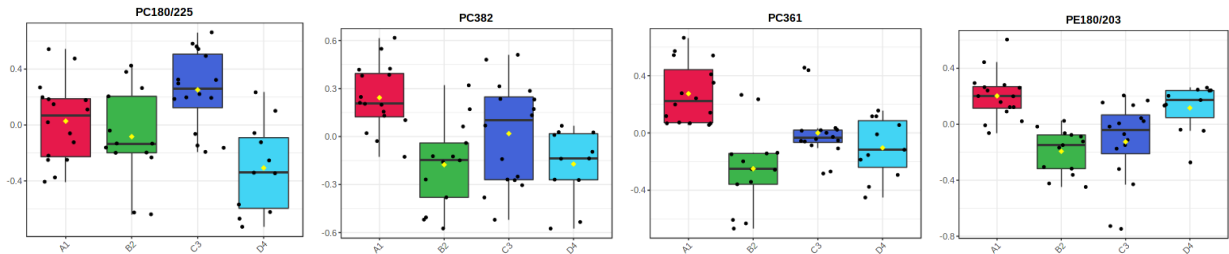

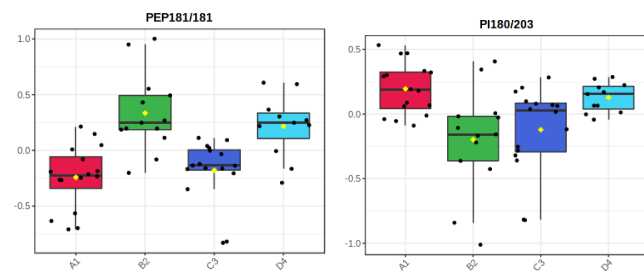

TG:

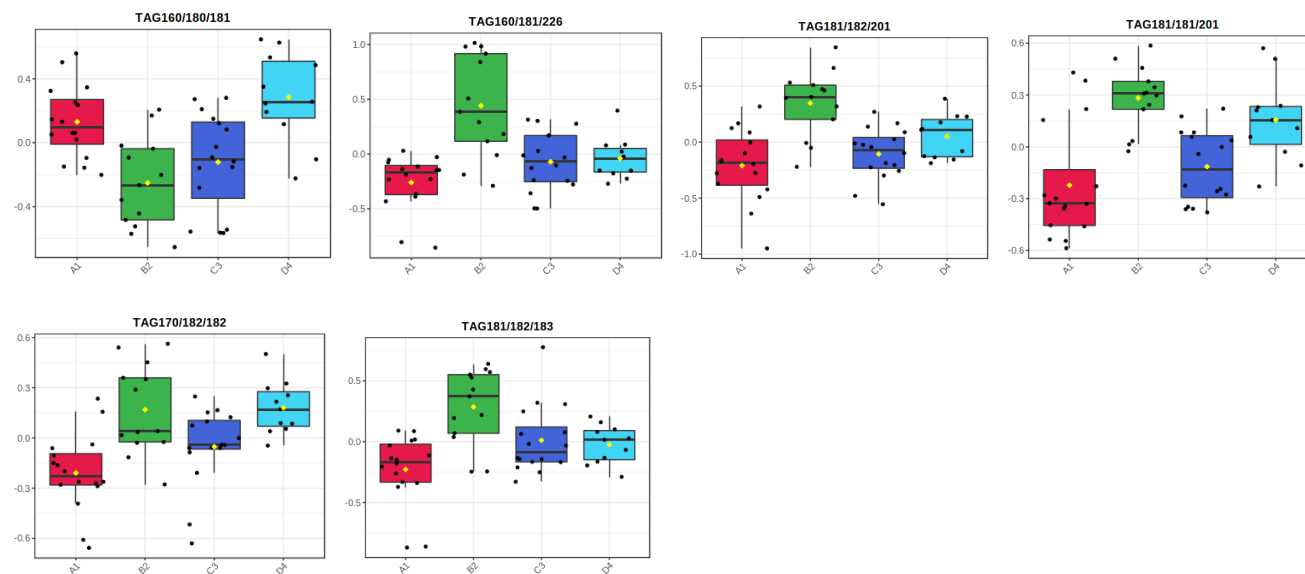

Supplement: s1 [file s1]
